# Supplementary material for: BVOC-aerosol-climate feedbacks investigated using NorESM
Source: Copernicus journal article supplement (doi:10.5194/acp-2018-930), 2018-10-10
Supplement: Supplementary file 1 [file acp-2018-930-supplement.pdf]

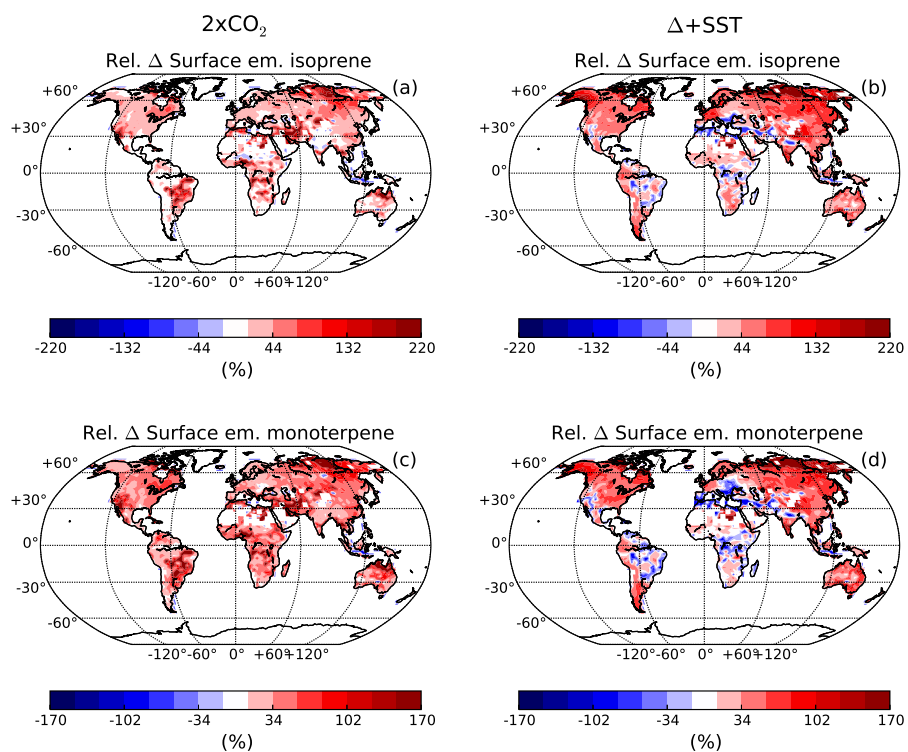

**Figure S1.** Relative difference in annually averaged the surface emissions of isoprene (a and b) and monoterpenes (c and d) for the  $2\times\text{CO}_2$  (a and c) and the  $+\Delta\text{SST}$  (b and d) experiments. The relative difference is defined as the  $(\text{FB-ON} - \text{FB-OFF}) / \text{FB-OFF}$ .

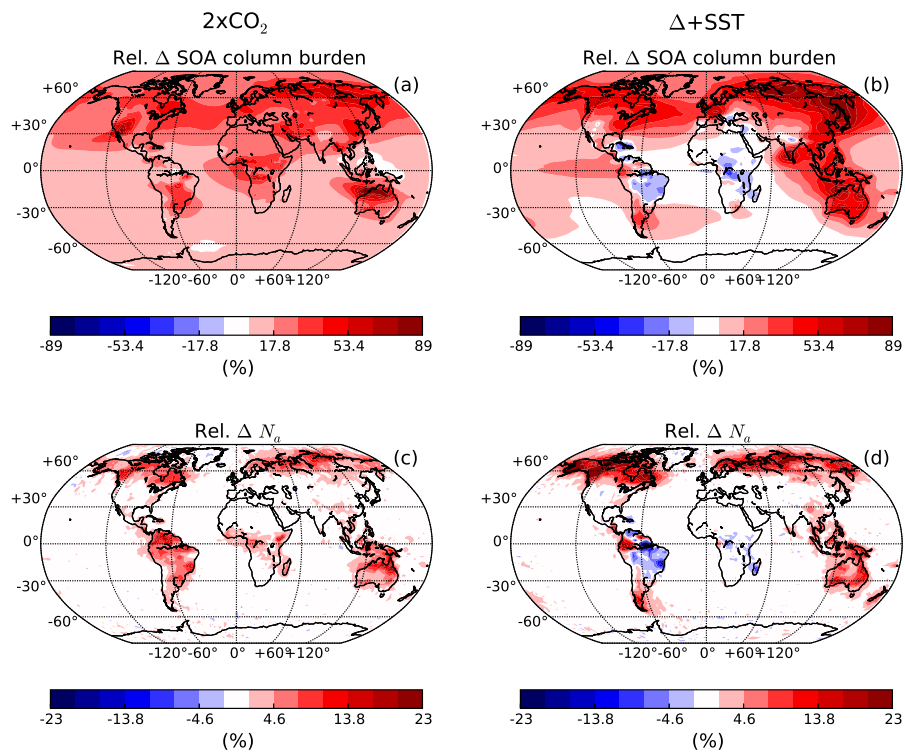

**Figure S2.** Relative difference in annually averaged column burden of SOA (a and b) as well as  $N_a$  in the boundary layer (c and d) for the  $2\times\text{CO}_2$  (a and c) + $\Delta\text{SST}$  (b and d) experiments.

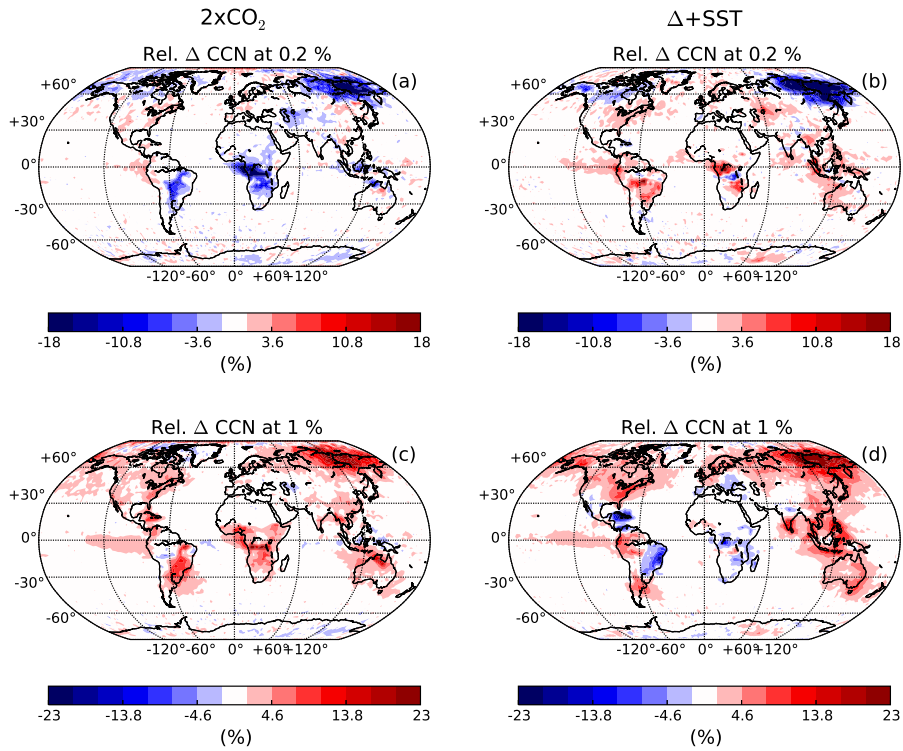

**Figure S3.** The relative difference between the FB-ON and FB-OFF simulations for the  $2\times\text{CO}_2$  (a and c) and  $+\Delta\text{SST}$  (b and d) experiment. The difference shown is the annually averaged concentration of CCN at 0.2 % (a and b) and 0.4 % (c and d) supersaturation in the boundary layer.

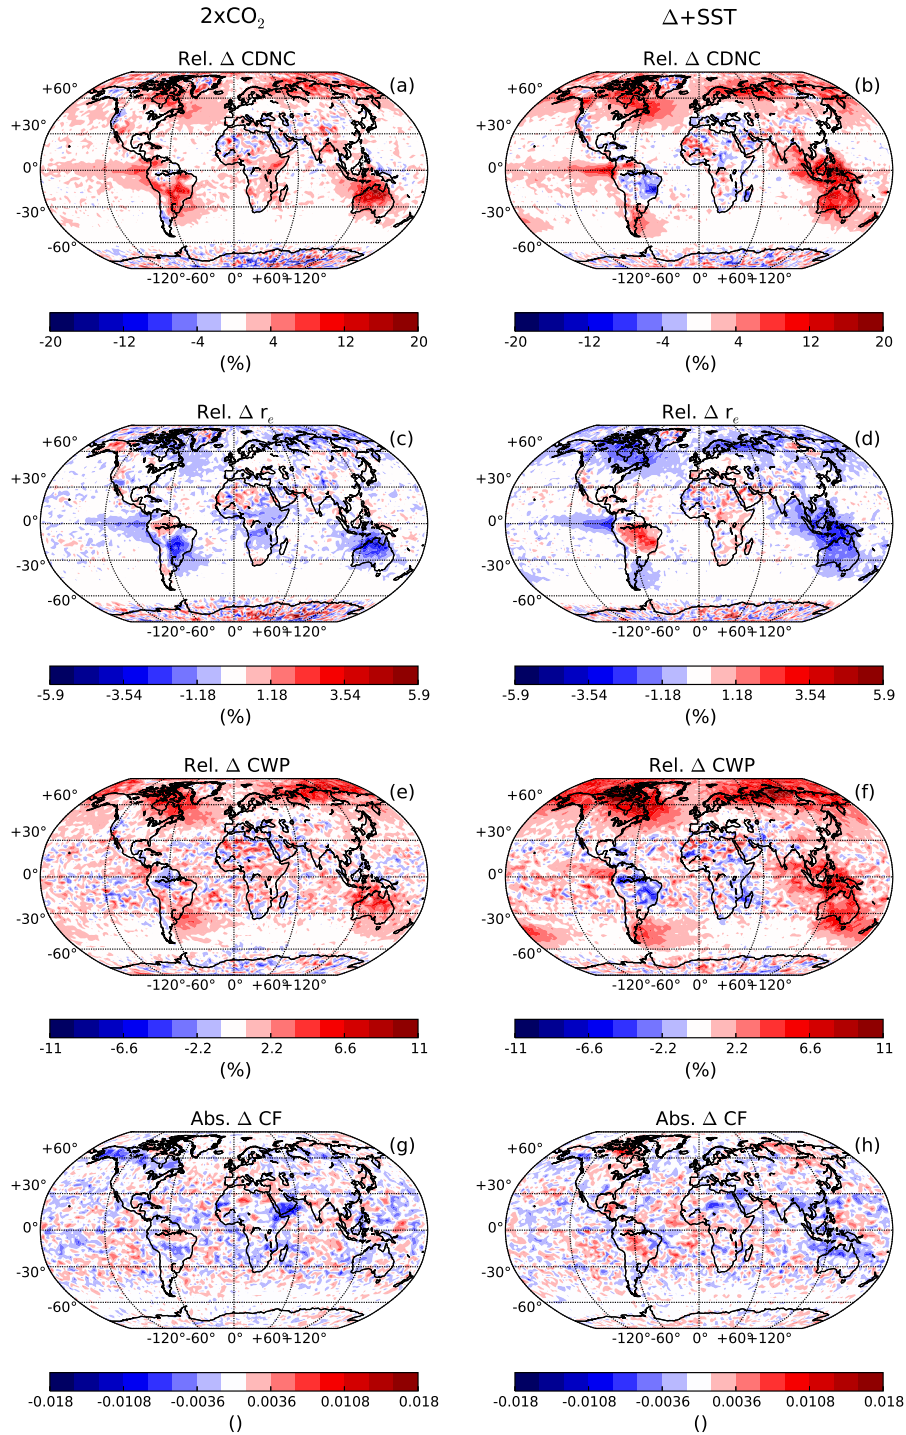

**Figure S4.** The relative difference in annually averaged CDNC (a and b),  $r_e$  (c and d), and CWP (e and f) as well as the absolute difference in annually averaged CF (g and h) between the FB-ON and FB-OFF simulations for the  $2\times\text{CO}_2$  (a, c, e, g) and  $+\Delta\text{SST}$  (b, d, f, h) experiment.



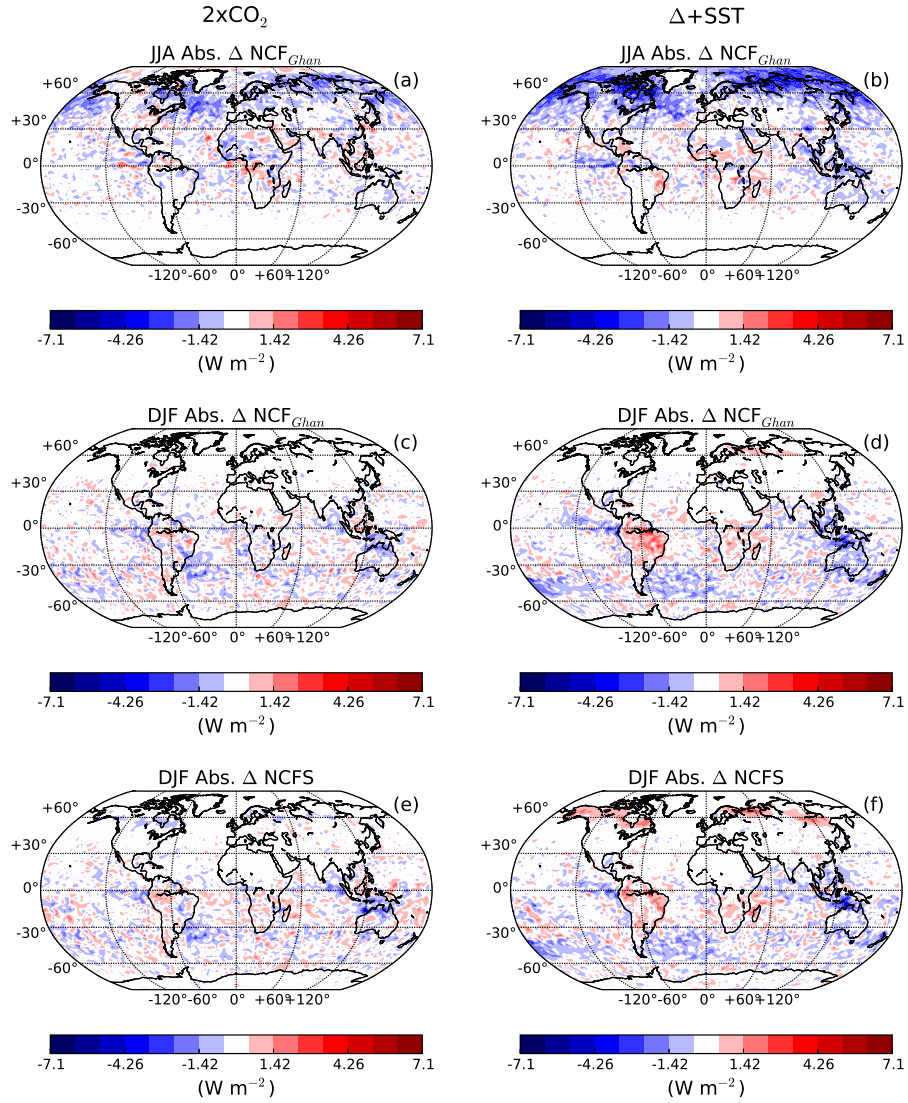

**Figure S5.** The absolute difference between the FB-ON and FB-OFF simulations for the  $NCF_{Ghan}$  during June, July and August (a and b), December January and February (c and d) as well as the NCFS during December January and February (e and f). The averages are from the  $2xCO_2$  (a, c, d) and  $+\Delta SST$  (b, d, c) experiment.

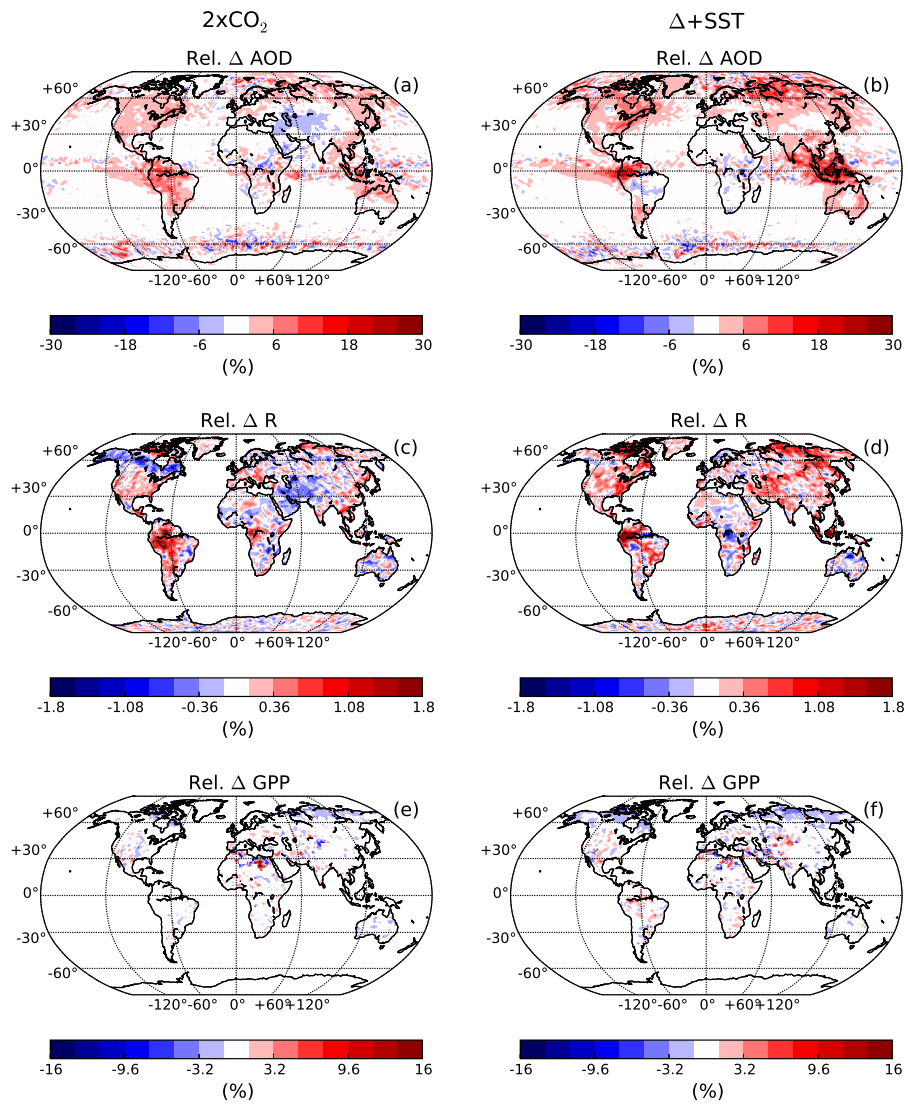

**Figure S6.** The figure shows the relative difference in annually averaged AOD (a and b), R (c and d) and GPP (e and f) for the 2xCO<sub>2</sub> (a, c, e, g) and +ΔSST (b, d, f, h) experiment.

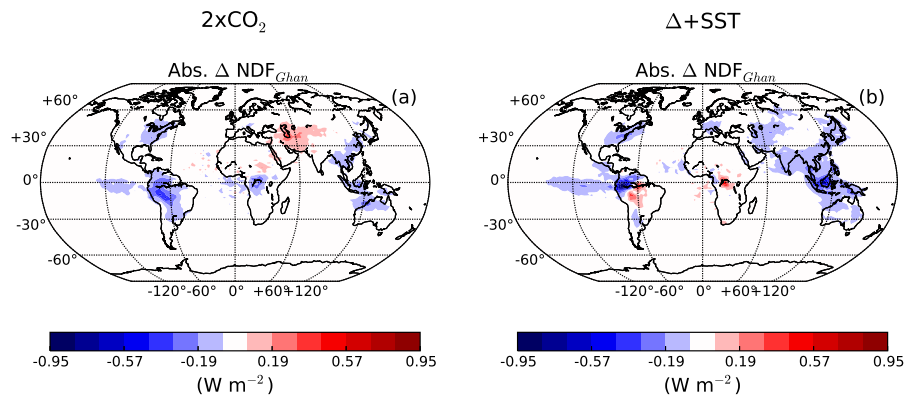

**Figure S7.** The figure shows the difference in the annually averaged  $NDF_{Ghan}$  between the FB-ON and FB-OFF simulations for the  $2xCO_2$  (a) and  $+\Delta SST$  (b) experiment.
